# Supplementary material
Source: publisher figshare collection journal article supplement (https://gsapubs.figshare.com/ndownloader/files/23316953)
Supplement: Supplementary file 1 [file 23316953]

## Sheet: PlotDat2
Source sheet	Final	34.3053	0.207753	29.4722	0.29	34.9967	0.205606	32.0319	0.249205	36.4542	0.168636	34.6113	0.206576	32.9732	0.227422	33.8575	0.220015	32.7967	0.248363	32.9117	0.232685	34.0134	0.221045	32.2952	0.242861	33.7587	0.221356	32.6623	0.234733	33.249	0.237675	33.1479	0.219816
Plot name	Concordia2	31.2207	0.255644	37.685	0.14	34.9816	0.20664	32.0209	0.250908	36.4392	0.169512	34.5963	0.207469	32.9624	0.22944	33.8436	0.220971	32.78	0.249285	32.8954	0.234271	34.0017	0.222193	32.2863	0.244209	33.7444	0.222387	32.6535	0.236131	33.2377	0.239421	33.1379	0.221482
Plot Type	1	35.7654	0.170682			34.9369	0.207723	31.988	0.252739	36.3947	0.17044	34.5517	0.208379	32.93	0.23166	33.8026	0.221958	32.7305	0.250165	32.8472	0.235966	33.9671	0.223435	32.26	0.245662	33.7019	0.223457	32.627	0.237648	33.2044	0.241314	33.1082	0.223307
1st free col	35	33.9213	0.207887			34.8646	0.208808	31.9342	0.25465	36.3227	0.171378	34.4796	0.209269	32.8771	0.234022	33.7362	0.222932	32.6504	0.250965	32.7691	0.237696	33.9112	0.224717	32.2169	0.247183	33.6332	0.224519	32.5838	0.239244	33.1497	0.243302	33.0596	0.225242
Sigma Level	2	32.175	0.236856			34.7679	0.209846	31.8609	0.256588	36.2263	0.172285	34.383	0.210098	32.805	0.236462	33.6474	0.223852	32.5433	0.251651	32.6646	0.239387	33.8364	0.225983	32.1582	0.248729	33.5413	0.225527	32.5249	0.240874	33.0754	0.245332	32.9934	0.227234
Absolute Errs	TRUE	33.2226	0.221677			34.651	0.210793	31.7702	0.2585	36.1098	0.173123	34.2663	0.21083	32.7157	0.238912	33.54	0.224677	32.4137	0.252192	32.5382	0.240963	33.7459	0.227178	32.0856	0.250257	33.4302	0.226435	32.452	0.242495	32.9833	0.247347	32.9114	0.229228
Symbol Type	1	32.0307	0.248338			34.519	0.211607	31.6645	0.260335	35.9783	0.173854	34.1345	0.211434	32.6117	0.241306	33.4188	0.22537	32.2674	0.252564	32.3956	0.242357	33.6438	0.22825	32.0009	0.251727	33.3047	0.227206	32.367	0.244061	32.8759	0.249294	32.8159	0.231172
Inverse Plot	TRUE	32.1647	0.236779			34.3776	0.212252	31.5467	0.262041	35.8374	0.174446	33.9934	0.211883	32.4958	0.243579	33.289	0.225902	32.1108	0.252752	32.2428	0.243507	33.5344	0.229151	31.9066	0.253099	33.1703	0.227804	32.2723	0.245531	32.7563	0.251118	32.7094	0.23301
Color Plot	TRUE	33.4784	0.224355			34.2331	0.212701	31.4199	0.263573	35.6934	0.174874	33.8492	0.212157	32.3711	0.245668	33.1562	0.22625	31.9507	0.252747	32.0866	0.244363	33.4225	0.229843	31.8051	0.254334	33.033	0.228204	32.1704	0.246865	32.6277	0.25277	32.5949	0.234694
3D plot	FALSE	31.6456	0.248106			34.0917	0.212934	31.2878	0.264889	35.5525	0.175118	33.7081	0.212244	32.2411	0.247517	33.0264	0.226397	31.7941	0.252549	31.9339	0.244887	33.3131	0.230295	31.6993	0.255399	32.8986	0.228389	32.0642	0.248025	32.4935	0.254205	32.4755	0.236177
Linear	FALSE	33.1016	0.22327			33.9597	0.21294	31.1538	0.265952	35.421	0.175169	33.5763	0.212141	32.1093	0.249075	32.9052	0.226338	31.6478	0.252167	31.7912	0.245057	33.2109	0.230487	31.592	0.256265	32.7731	0.22835	31.9565	0.24898	32.3575	0.255384	32.3545	0.23742
Data Range	G5:J18	32.0102	0.240518			33.8427	0.212719	31.0217	0.266734	35.3045	0.175024	33.4596	0.211853	31.9792	0.2503	32.7978	0.226076	31.5182	0.251618	31.6648	0.244865	33.1205	0.230412	31.4862	0.256909	32.6619	0.228089	31.8502	0.249705	32.2233	0.256275	32.2351	0.238387
Filled Symbols	FALSE	32.4254	0.244813			33.746	0.212282	30.8949	0.267214	35.2081	0.174688	33.363	0.21139	31.8545	0.251158	32.709	0.225621	31.4111	0.250925	31.5603	0.24432	33.0456	0.230071	31.3847	0.257312	32.57	0.227617	31.7484	0.250179	32.0947	0.256853	32.1206	0.239052
ConcAge	FALSE	32.4149	0.227337			33.6737	0.211646	30.7771	0.267378	35.1361	0.174178	33.2909	0.210775	31.7386	0.251626	32.6426	0.224994	31.331	0.25012	31.4822	0.243446	32.9897	0.229481	31.2903	0.257465	32.5013	0.226955	31.6536	0.250389	31.9751	0.257102	32.0141	0.239398
ConcSwap	TRUE	IsoLine	IsoLine			33.6291	0.21084	30.6714	0.267222	35.0916	0.173515	33.2463	0.210034	31.6345	0.251691	32.6016	0.224222	31.2815	0.249236	31.434	0.24228	32.9551	0.228667	31.2057	0.257362	32.4589	0.226133	31.5686	0.25033	31.8677	0.257016	31.9185	0.239415
1st Symbol-row	1					33.614	0.2099	30.5806	0.266751	35.0765	0.172728	33.2313	0.209199	31.5452	0.251351	32.5877	0.223338	31.2648	0.248313	31.4176	0.240873	32.9434	0.227664	31.133	0.257007	32.4445	0.225185	31.4957	0.250004	31.7756	0.256598	31.8365	0.239103
						33.6291	0.208865	30.5073	0.265976	35.0916	0.171852	33.2463	0.208306	31.4731	0.250616	32.6016	0.222382	31.2815	0.247392	31.434	0.239288	32.9551	0.226517	31.0743	0.256408	32.4589	0.224153	31.4368	0.249419	31.7012	0.255858	31.7703	0.23847
						33.6737	0.207782	30.4535	0.264919	35.1361	0.170924	33.2909	0.207395	31.4201	0.249506	32.6426	0.221396	31.331	0.246512	31.4822	0.237593	32.9897	0.225275	31.0312	0.255584	32.5013	0.223083	31.3935	0.248591	31.6465	0.254817	31.7217	0.237533
						33.746	0.206698	30.4206	0.26361	35.2081	0.169986	33.363	0.206506	31.3877	0.24805	32.7089	0.220421	31.4111	0.245711	31.5603	0.235863	33.0456	0.223993	31.0049	0.254555	32.57	0.222021	31.367	0.247542	31.6131	0.253503	31.6919	0.236318
						33.8427	0.205659	30.4095	0.262083	35.3045	0.169078	33.4596	0.205677	31.3768	0.24629	32.7978	0.219501	31.5182	0.245026	31.6648	0.234172	33.1204	0.222727	30.996	0.253351	32.6619	0.221014	31.3581	0.246302	31.6019	0.251951	31.6819	0.234857
						33.9596	0.204712	30.4206	0.260381	35.421	0.168241	33.5763	0.204944	31.3877	0.244272	32.9051	0.218677	31.6478	0.244485	31.7911	0.232596	33.2109	0.221532	31.0048	0.252003	32.7731	0.220105	31.367	0.244905	31.6131	0.250206	31.6919	0.233192
						34.0917	0.203898	30.4535	0.258549	35.5525	0.16751	33.7081	0.204341	31.42	0.242051	33.0264	0.217983	31.7941	0.244112	31.9338	0.231202	33.3131	0.22046	31.0312	0.25055	32.8986	0.219335	31.3934	0.243388	31.6465	0.248313	31.7216	0.231367
						34.233	0.203253	30.5073	0.256638	35.6934	0.166918	33.8492	0.203892	31.473	0.239689	33.1562	0.217451	31.9507	0.243925	32.0866	0.230052	33.4225	0.219559	31.0742	0.249029	33.0329	0.218737	31.4367	0.241792	31.7011	0.246324	31.7702	0.229432
						34.3776	0.202804	30.5805	0.2547	35.8374	0.16649	33.9934	0.203618	31.5451	0.23725	33.2889	0.217104	32.1108	0.24393	32.2427	0.229196	33.5343	0.218867	31.1329	0.247483	33.1703	0.218336	31.4956	0.240162	31.7755	0.244295	31.8364	0.22744
						34.5189	0.202571	30.6713	0.252788	35.9782	0.166245	34.1345	0.20353	31.6343	0.234799	33.4188	0.216956	32.2674	0.244128	32.3955	0.228672	33.6437	0.218415	31.2056	0.245955	33.3047	0.218152	31.5685	0.238541	31.8676	0.242279	31.9184	0.225445
						34.651	0.202565	30.777	0.250954	36.1098	0.166195	34.2663	0.203633	31.7383	0.232405	33.54	0.217015	32.4137	0.244509	32.5382	0.228502	33.7459	0.218222	31.2902	0.244485	33.4302	0.218191	31.6535	0.236974	31.9749	0.240333	32.0139	0.223502
						34.7679	0.202786	30.8948	0.249247	36.2263	0.16634	34.383	0.203922	31.8543	0.230133	33.6474	0.217278	32.5433	0.245059	32.6645	0.228693	33.8363	0.218298	31.3846	0.243114	33.5413	0.218452	31.7482	0.235504	32.0945	0.238509	32.1204	0.221664
						34.8646	0.203224	31.0215	0.247715	36.3227	0.166675	34.4796	0.204384	31.979	0.228043	33.7362	0.217732	32.6504	0.245751	32.769	0.229239	33.9112	0.218638	31.486	0.241879	33.6332	0.218924	31.8501	0.234171	32.2232	0.236857	32.2349	0.21998
						34.9369	0.203859	31.1537	0.2464	36.3947	0.167186	34.5517	0.204999	32.109	0.226195	33.8026	0.21836	32.7305	0.246557	32.8471	0.230113	33.9671	0.219228	31.5919	0.240813	33.7019	0.219585	31.9563	0.233011	32.3573	0.235422	32.3543	0.218496
						34.9816	0.204665	31.2876	0.245336	36.4392	0.167849	34.5963	0.205741	32.2408	0.224636	33.8436	0.219132	32.78	0.24744	32.8954	0.231279	34.0017	0.220043	31.6991	0.239947	33.7444	0.220408	32.064	0.232056	32.4933	0.234243	32.4753	0.217254
						34.9967	0.205606	31.4198	0.244554	36.4542	0.168636	34.6113	0.206576	32.3708	0.223412	33.8575	0.220015	32.7967	0.248363	32.9117	0.232685	34.0134	0.221045	31.805	0.239303	33.7587	0.221356	32.1703	0.231331	32.6275	0.233352	32.5948	0.216287
						Black	Black	31.5465	0.244074	Black	Black	Black	Black	32.4955	0.222554	Black	Black	Black	Black	Black	Black	Black	Black	31.9064	0.2389	Black	Black	32.2721	0.230857	32.7562	0.232774	32.7093	0.215622
								31.6644	0.24391					32.6115	0.222086									32.0008	0.238747			32.3669	0.230647	32.8758	0.232525	32.8157	0.215276
								31.7701	0.244066					32.7155	0.222021									32.0855	0.23885			32.4518	0.230706	32.9831	0.23261	32.9113	0.215259
								31.8608	0.244538					32.8048	0.22236									32.1581	0.239206			32.5248	0.231032	33.0753	0.233029	32.9933	0.215571
								31.9341	0.245312					32.877	0.223095									32.2168	0.239804			32.5837	0.231617	33.1497	0.233769	33.0595	0.216204
								31.988	0.246369					32.9299	0.224205									32.2599	0.240628			32.627	0.232445	33.2043	0.23481	33.1082	0.217141
								32.0209	0.247678					32.9623	0.225661									32.2863	0.241657			32.6534	0.233494	33.2377	0.236124	33.1379	0.218356
								32.0319	0.249205					32.9732	0.227422									32.2952	0.242861			32.6623	0.234733	33.249	0.237675	33.1479	0.219816
								Black	Black					Black	Black									Black	Black			Black	Black	Black	Black	Black	Black

## Sheet: PlotDat3
Source sheet	Final	34.3053	0.207753	0.873411	0.8	15.6212	0.0547005	1.54844	0.8	34.9967	0.205606	32.0319	0.249205	36.4542	0.168636	34.6113	0.206576	32.9732	0.227422	33.8575	0.220015	32.7967	0.248363	32.9117	0.232685	34.0134	0.221045	32.2952	0.242861	33.7587	0.221356	32.6623	0.234733	33.249	0.237675	33.1479	0.219816
Plot name	Concordia3	31.2207	0.255644	0.90228	0.738893	7.56836	0.0657994	13	0.590848	34.9687	0.207031	31.9991	0.25223	36.4263	0.169846	34.5834	0.2078	32.9409	0.231038	33.8318	0.221329	32.7657	0.249611	32.8815	0.234878	33.9917	0.222636	32.2689	0.245258	33.7321	0.222774	32.636	0.237225	33.2156	0.240786	33.1182	0.222796
Plot Type	1	35.7654	0.170682	0.943269	0.666121	4.88752	0.0801223			34.8869	0.208515	31.9032	0.255531	36.3449	0.171123	34.5018	0.209031	32.8466	0.235126	33.7567	0.22267	32.6751	0.250757	32.7932	0.237225	33.9285	0.224366	32.1921	0.247885	33.6544	0.224233	32.5589	0.239983	33.1183	0.244223	33.0316	0.226143
1st free col	39	33.9213	0.207887	0.987086	0.60097	3.54967	0.0987156			34.7581	0.209937	31.752	0.258841	36.2165	0.172365	34.3732	0.210169	32.6978	0.239353	33.6384	0.223932	32.5323	0.251706	32.6539	0.239536	33.8288	0.226095	32.071	0.25053	33.5319	0.225614	32.4373	0.242785	32.9648	0.247708	32.895	0.229587
Sigma Level	2	32.175	0.236856	1.03402	0.542618	2.74902	0.122987			34.5925	0.211182	31.5578	0.261892	36.0515	0.17347	34.208	0.211122	32.5067	0.243379	33.4863	0.22501	32.3489	0.252383	32.4751	0.241623	33.7007	0.227683	31.9155	0.252979	33.3746	0.226805	32.2812	0.245403	32.7676	0.250958	32.7195	0.232849
Absolute Errs	TRUE	33.2226	0.221677	1.08441	0.490335	2.21696	0.154833			34.4037	0.212149	31.3363	0.264438	35.8634	0.17435	34.0195	0.211814	32.2888	0.246876	33.313	0.225819	32.1398	0.252732	32.271	0.243318	33.5546	0.229002	31.7381	0.255033	33.1952	0.227709	32.1031	0.247625	32.5427	0.253711	32.5193	0.235664
Symbol Type	1	32.0307	0.248338	1.13862	0.443469	1.83837	0.196819			34.2069	0.21276	31.1054	0.26627	35.6674	0.174932	33.8231	0.212187	32.0616	0.249561	33.1322	0.226292	31.9217	0.252725	32.0584	0.244483	33.4023	0.229944	31.5532	0.256526	33.0081	0.228254	31.9175	0.249272	32.3083	0.255743	32.3107	0.237805
Inverse Plot	TRUE	32.1647	0.236779	1.19711	0.401441	1.5557	0.252419			34.0181	0.212966	30.8838	0.267242	35.4792	0.17517	33.6347	0.212212	31.8436	0.251217	32.9589	0.226391	31.7126	0.252362	31.8544	0.245025	33.2562	0.230433	31.3758	0.257337	32.8287	0.228395	31.7394	0.250209	32.0834	0.256889	32.1105	0.239097
Color Plot	TRUE	33.4784	0.224355	1.26036	0.363733	1.33697	0.326345			33.8526	0.212749	30.6896	0.267274	35.3143	0.175045	33.4694	0.211886	31.6524	0.251709	32.8068	0.226108	31.5292	0.251674	31.6755	0.244898	33.1281	0.23043	31.2202	0.2574	32.6713	0.228121	31.5833	0.250361	31.8862	0.257057	31.935	0.239437
3D plot	FALSE	31.6456	0.248106	1.32898	0.329886	1.16298	0.425008			33.7237	0.212127	30.5383	0.266364	35.1859	0.174566	33.3408	0.211237	31.5036	0.250998	32.6885	0.225466	31.3864	0.250715	31.5362	0.244113	33.0284	0.229934	31.0991	0.25671	32.5488	0.227454	31.4617	0.249716	31.7327	0.256233	31.7983	0.238796
Linear	FALSE	33.1016	0.22327	1.40366	0.29949	1.02154	0.557136			33.642	0.211151	30.4424	0.264586	35.1045	0.173772	33.2592	0.210316	31.4092	0.249142	32.6134	0.224517	31.2958	0.249564	31.4479	0.242735	32.9651	0.228987	31.0223	0.255323	32.4711	0.226448	31.3846	0.248325	31.6353	0.254484	31.7116	0.237228
Data Range	G5:J18	32.0102	0.240518	1.48521	0.272179	0.904487	0.734635			33.614	0.2099	30.4095	0.262083	35.0765	0.172728	33.2313	0.209199	31.3768	0.24629	32.5877	0.223338	31.2648	0.248313	31.4176	0.240873	32.9434	0.227664	30.996	0.253351	32.4445	0.225185	31.3581	0.246302	31.6019	0.251951	31.6819	0.234857
Filled Symbols	FALSE	32.4254	0.244813	1.5746	0.247627	IsoLine	IsoLine			33.642	0.208474	30.4424	0.259058	35.1044	0.171518	33.2592	0.207975	31.4091	0.242673	32.6134	0.222025	31.2958	0.247065	31.4479	0.238681	32.9651	0.226074	31.0223	0.250954	32.4711	0.223766	31.3845	0.243811	31.6352	0.248841	31.7116	0.231878
ConcAge	FALSE	32.4149	0.227337	1.67299	0.225543					33.7237	0.206991	30.5383	0.255757	35.1859	0.170241	33.3408	0.206744	31.5035	0.238586	32.6885	0.220683	31.3864	0.245919	31.5362	0.236334	33.0283	0.224344	31.0991	0.248327	32.5488	0.222308	31.4616	0.241053	31.7326	0.245404	31.7982	0.228531
ConcSwap	TRUE	IsoLine	IsoLine	1.78179	0.205669					33.8526	0.205569	30.6894	0.252447	35.3143	0.168999	33.4694	0.205606	31.6522	0.234358	32.8068	0.219422	31.5292	0.24497	31.6754	0.234023	33.1281	0.222614	31.2201	0.245682	32.6713	0.220927	31.5832	0.238251	31.886	0.241919	31.9348	0.225087
1st Symbol-row	1			1.9027	0.187774					34.0181	0.204324	30.8837	0.249396	35.4792	0.167893	33.6346	0.204652	31.8433	0.230333	32.9588	0.218343	31.7126	0.244293	31.8543	0.231936	33.2561	0.221026	31.3757	0.243233	32.8286	0.219736	31.7393	0.235633	32.0832	0.238668	32.1103	0.221825
				2.03782	0.17165					34.2069	0.203356	31.1052	0.246851	35.6673	0.167014	33.8231	0.203961	32.0613	0.226836	33.1322	0.217535	31.9217	0.243944	32.0583	0.230241	33.4022	0.219708	31.5531	0.241179	33.0081	0.218831	31.9174	0.233411	32.3081	0.235916	32.3105	0.21901
				2.18978	0.157113					34.4037	0.202745	31.3361	0.245018	35.8634	0.166431	34.0195	0.203588	32.2885	0.22415	33.3129	0.217062	32.1398	0.243952	32.271	0.229076	33.5545	0.218766	31.738	0.239686	33.1951	0.218286	32.103	0.231764	32.5425	0.233884	32.5191	0.216869
				2.36187	0.144					34.5925	0.20254	31.5576	0.244046	36.0515	0.166193	34.208	0.203563	32.5065	0.222495	33.4863	0.216963	32.3489	0.244314	32.475	0.228534	33.7006	0.218277	31.9154	0.238876	33.3746	0.218145	32.2811	0.230827	32.7675	0.232738	32.7193	0.215577
				2.55835	0.132163					34.758	0.202757	31.7519	0.244014	36.2165	0.166319	34.3732	0.203888	32.6976	0.222002	33.6383	0.217246	32.5323	0.245002	32.6539	0.228661	33.8287	0.21828	32.0709	0.238813	33.5319	0.218419	32.4372	0.230675	32.9647	0.23257	32.8948	0.215237
				2.7847	0.12147					34.8869	0.203378	31.9031	0.244924	36.3449	0.166798	34.5018	0.204538	32.8465	0.222713	33.7567	0.217887	32.6751	0.245961	32.7931	0.229446	33.9284	0.218775	32.192	0.239503	33.6544	0.219086	32.5588	0.23132	33.1182	0.233394	33.0315	0.215877
				3.04823	0.111805					34.9687	0.204354	31.9991	0.246702	36.4263	0.167592	34.5834	0.205458	32.9409	0.22457	33.8318	0.218836	32.7657	0.247112	32.8815	0.230824	33.9917	0.219723	32.2688	0.24089	33.7321	0.220092	32.6359	0.23271	33.2156	0.235143	33.1182	0.217446
				3.35884	0.103063					34.9967	0.205606	32.0319	0.249205	36.4542	0.168636	34.6113	0.206576	32.9732	0.227422	33.8575	0.220015	32.7967	0.248363	32.9117	0.232685	34.0134	0.221045	32.2952	0.242861	33.7587	0.221356	32.6623	0.234733	33.249	0.237675	33.1479	0.219816
				3.73027	0.0951495					Black	Black	Black	Black	Black	Black	Black	Black	Black	Black	Black	Black	Black	Black	Black	Black	Black	Black	Black	Black	Black	Black	Black	Black	Black	Black	Black	Black
				4.18217	0.087981
				4.74373	0.0814824
				5.46013	0.0755864
				6.40537	0.070233
				7.70955	0.0653681
				9.62436	0.0609435
				12.7087	0.0569159
				13	0.0567314
				IsoLine	IsoLine

## Sheet: PlotDat4
Source sheet	Final	34.3053	0.207753	0.832237	0.9	15.6212	0.0547005	0	0.828281	34.9967	0.205606	32.0319	0.249205	36.4542	0.168636	34.6113	0.206576	32.9732	0.227422	33.8575	0.220015	32.7967	0.248363	32.9117	0.232685	34.0134	0.221045	32.2952	0.242861	33.7587	0.221356	32.6623	0.234733	33.249	0.237675	33.1479	0.219816
Plot name	Concordia4	31.2207	0.255644	0.836603	0.887424	7.56836	0.0657994	13	0.590848	34.9687	0.207031	31.9991	0.25223	36.4263	0.169846	34.5834	0.2078	32.9409	0.231038	33.8318	0.221329	32.7657	0.249611	32.8815	0.234878	33.9917	0.222636	32.2689	0.245258	33.7321	0.222774	32.636	0.237225	33.2156	0.240786	33.1182	0.222796
Plot Type	1	35.7654	0.170682	0.874816	0.795551	4.88752	0.0801223			34.8869	0.208515	31.9032	0.255531	36.3449	0.171123	34.5018	0.209031	32.8466	0.235126	33.7567	0.22267	32.6751	0.250757	32.7932	0.237225	33.9285	0.224366	32.1921	0.247885	33.6544	0.224233	32.5589	0.239983	33.1183	0.244223	33.0316	0.226143
1st free col	39	33.9213	0.207887	0.915645	0.713734	3.54967	0.0987156			34.7581	0.209937	31.752	0.258841	36.2165	0.172365	34.3732	0.210169	32.6978	0.239353	33.6384	0.223932	32.5323	0.251706	32.6539	0.239536	33.8288	0.226095	32.071	0.25053	33.5319	0.225614	32.4373	0.242785	32.9648	0.247708	32.895	0.229587
Sigma Level	2	32.175	0.236856	0.959354	0.640842	2.74902	0.122987			34.5925	0.211182	31.5578	0.261892	36.0515	0.17347	34.208	0.211122	32.5067	0.243379	33.4863	0.22501	32.3489	0.252383	32.4751	0.241623	33.7007	0.227683	31.9155	0.252979	33.3746	0.226805	32.2812	0.245403	32.7676	0.250958	32.7195	0.232849
Absolute Errs	TRUE	33.2226	0.221677	1.00625	0.575874	2.21696	0.154833			34.4037	0.212149	31.3363	0.264438	35.8634	0.17435	34.0195	0.211814	32.2888	0.246876	33.313	0.225819	32.1398	0.252732	32.271	0.243318	33.5546	0.229002	31.7381	0.255033	33.1952	0.227709	32.1031	0.247625	32.5427	0.253711	32.5193	0.235664
Symbol Type	1	32.0307	0.248338	1.05667	0.517943	1.83837	0.196819			34.2069	0.21276	31.1054	0.26627	35.6674	0.174932	33.8231	0.212187	32.0616	0.249561	33.1322	0.226292	31.9217	0.252725	32.0584	0.244483	33.4023	0.229944	31.5532	0.256526	33.0081	0.228254	31.9175	0.249272	32.3083	0.255743	32.3107	0.237805
Inverse Plot	TRUE	32.1647	0.236779	1.11101	0.466263	1.5557	0.252419			34.0181	0.212966	30.8838	0.267242	35.4792	0.17517	33.6347	0.212212	31.8436	0.251217	32.9589	0.226391	31.7126	0.252362	31.8544	0.245025	33.2562	0.230433	31.3758	0.257337	32.8287	0.228395	31.7394	0.250209	32.0834	0.256889	32.1105	0.239097
Color Plot	TRUE	33.4784	0.224355	1.16974	0.420138	1.33697	0.326345			33.8526	0.212749	30.6896	0.267274	35.3143	0.175045	33.4694	0.211886	31.6524	0.251709	32.8068	0.226108	31.5292	0.251674	31.6755	0.244898	33.1281	0.23043	31.2202	0.2574	32.6713	0.228121	31.5833	0.250361	31.8862	0.257057	31.935	0.239437
3D plot	FALSE	31.6456	0.248106	1.23339	0.37895	1.16298	0.425008			33.7237	0.212127	30.5383	0.266364	35.1859	0.174566	33.3408	0.211237	31.5036	0.250998	32.6885	0.225466	31.3864	0.250715	31.5362	0.244113	33.0284	0.229934	31.0991	0.25671	32.5488	0.227454	31.4617	0.249716	31.7327	0.256233	31.7983	0.238796
Linear	FALSE	33.1016	0.22327	1.30258	0.342153	1.02154	0.557136			33.642	0.211151	30.4424	0.264586	35.1045	0.173772	33.2592	0.210316	31.4092	0.249142	32.6134	0.224517	31.2958	0.249564	31.4479	0.242735	32.9651	0.228987	31.0223	0.255323	32.4711	0.226448	31.3846	0.248325	31.6353	0.254484	31.7116	0.237228
Data Range	G5:J18	32.0102	0.240518	1.37805	0.309262	0.904487	0.734635			33.614	0.2099	30.4095	0.262083	35.0765	0.172728	33.2313	0.209199	31.3768	0.24629	32.5877	0.223338	31.2648	0.248313	31.4176	0.240873	32.9434	0.227664	30.996	0.253351	32.4445	0.225185	31.3581	0.246302	31.6019	0.251951	31.6819	0.234857
Filled Symbols	FALSE	32.4254	0.244813	1.46066	0.279845	IsoLine	IsoLine			33.642	0.208474	30.4424	0.259058	35.1044	0.171518	33.2592	0.207975	31.4091	0.242673	32.6134	0.222025	31.2958	0.247065	31.4479	0.238681	32.9651	0.226074	31.0223	0.250954	32.4711	0.223766	31.3845	0.243811	31.6352	0.248841	31.7116	0.231878
ConcAge	FALSE	32.4149	0.227337	1.55146	0.253522					33.7237	0.206991	30.5383	0.255757	35.1859	0.170241	33.3408	0.206744	31.5035	0.238586	32.6885	0.220683	31.3864	0.245919	31.5362	0.236334	33.0283	0.224344	31.0991	0.248327	32.5488	0.222308	31.4616	0.241053	31.7326	0.245404	31.7982	0.228531
ConcSwap	TRUE	IsoLine	IsoLine	1.65169	0.229954					33.8526	0.205569	30.6894	0.252447	35.3143	0.168999	33.4694	0.205606	31.6522	0.234358	32.8068	0.219422	31.5292	0.24497	31.6754	0.234023	33.1281	0.222614	31.2201	0.245682	32.6713	0.220927	31.5832	0.238251	31.886	0.241919	31.9348	0.225087
1st Symbol-row	1			1.76287	0.208838					34.0181	0.204324	30.8837	0.249396	35.4792	0.167893	33.6346	0.204652	31.8433	0.230333	32.9588	0.218343	31.7126	0.244293	31.8543	0.231936	33.2561	0.221026	31.3757	0.243233	32.8286	0.219736	31.7393	0.235633	32.0832	0.238668	32.1103	0.221825
				1.88685	0.18991					34.2069	0.203356	31.1052	0.246851	35.6673	0.167014	33.8231	0.203961	32.0613	0.226836	33.1322	0.217535	31.9217	0.243944	32.0583	0.230241	33.4022	0.219708	31.5531	0.241179	33.0081	0.218831	31.9174	0.233411	32.3081	0.235916	32.3105	0.21901
				2.02596	0.17293					34.4037	0.202745	31.3361	0.245018	35.8634	0.166431	34.0195	0.203588	32.2885	0.22415	33.3129	0.217062	32.1398	0.243952	32.271	0.229076	33.5545	0.218766	31.738	0.239686	33.1951	0.218286	32.103	0.231764	32.5425	0.233884	32.5191	0.216869
				2.18307	0.157689					34.5925	0.20254	31.5576	0.244046	36.0515	0.166193	34.208	0.203563	32.5065	0.222495	33.4863	0.216963	32.3489	0.244314	32.475	0.228534	33.7006	0.218277	31.9154	0.238876	33.3746	0.218145	32.2811	0.230827	32.7675	0.232738	32.7193	0.215577
				2.36187	0.144					34.758	0.202757	31.7519	0.244014	36.2165	0.166319	34.3732	0.203888	32.6976	0.222002	33.6383	0.217246	32.5323	0.245002	32.6539	0.228661	33.8287	0.21828	32.0709	0.238813	33.5319	0.218419	32.4372	0.230675	32.9647	0.23257	32.8948	0.215237
				2.56714	0.131695					34.8869	0.203378	31.9031	0.244924	36.3449	0.166798	34.5018	0.204538	32.8465	0.222713	33.7567	0.217887	32.6751	0.245961	32.7931	0.229446	33.9284	0.218775	32.192	0.239503	33.6544	0.219086	32.5588	0.23132	33.1182	0.233394	33.0315	0.215877
				2.80512	0.120627					34.9687	0.204354	31.9991	0.246702	36.4263	0.167592	34.5834	0.205458	32.9409	0.22457	33.8318	0.218836	32.7657	0.247112	32.8815	0.230824	33.9917	0.219723	32.2688	0.24089	33.7321	0.220092	32.6359	0.23271	33.2156	0.235143	33.1182	0.217446
				3.08425	0.110664					34.9967	0.205606	32.0319	0.249205	36.4542	0.168636	34.6113	0.206576	32.9732	0.227422	33.8575	0.220015	32.7967	0.248363	32.9117	0.232685	34.0134	0.221045	32.2952	0.242861	33.7587	0.221356	32.6623	0.234733	33.249	0.237675	33.1479	0.219816
				3.41608	0.101689					Black	Black	Black	Black	Black	Black	Black	Black	Black	Black	Black	Black	Black	Black	Black	Black	Black	Black	Black	Black	Black	Black	Black	Black	Black	Black	Black	Black
				3.81698	0.0935972
				4.31086	0.0862963
				4.9341	0.0797033
				5.7449	0.0737445
				6.84258	0.0683541
				8.41155	0.0634736
				10.8374	0.0590507
				13	0.0570076
				IsoLine	IsoLine

## Sheet: PlotDat5
Source sheet	Final	35.3857	0.193251	0.832237	0.9	15.6212	0.0547005	0	0.816972	36.1366	0.189311	29.0255	0.304828	33.7298	0.239993	34.2115	0.212798	37.929	0.15238	37.5355	0.150366	34.27	0.202529	38.4527	0.137655	31.9042	0.247675	32.5882	0.239296	36.7993	0.175733	34.2637	0.200318	34.5895	0.212873
Plot name	Concordia5	28.4414	0.30859	0.836603	0.887424	7.56836	0.0657994	13	0.584725	36.1062	0.191169	29.0019	0.307114	33.6895	0.243259	34.1773	0.214724	37.8884	0.153532	37.5198	0.151032	34.2389	0.204911	38.4306	0.138726	31.8758	0.250567	32.5533	0.243219	36.7647	0.177681	34.2461	0.202207	34.5611	0.214992
Plot Type	1	32.7332	0.246662	0.874816	0.795551	4.88752	0.0801223			36.0174	0.193197	28.9328	0.30952	33.5717	0.246801	34.0774	0.216743	37.77	0.154679	37.4739	0.151751	34.148	0.207542	38.3662	0.139917	31.7927	0.253766	32.4514	0.247626	36.6637	0.179807	34.1948	0.204371	34.478	0.217316
1st free col	37	33.3667	0.215862	0.915645	0.713734	3.54967	0.0987156			35.8775	0.195228	28.824	0.31185	33.3859	0.250331	33.9199	0.21869	37.5834	0.155727	37.4015	0.152464	34.0046	0.210209	38.2645	0.141132	31.6617	0.257012	32.2907	0.252161	36.5046	0.18194	34.1139	0.206636	34.347	0.219655
Sigma Level	2	36.9276	0.153463	0.959354	0.640842	2.74902	0.122987			35.6977	0.1971	28.6841	0.313916	33.1473	0.253565	33.7177	0.220408	37.3436	0.156591	37.3085	0.153114	33.8204	0.212696	38.134	0.142273	31.4933	0.260043	32.0842	0.256455	36.3001	0.183906	34.0099	0.208817	34.1788	0.22182
Absolute Errs	TRUE	37.1471	0.151681	1.00625	0.575874	2.21696	0.154833			35.4926	0.198659	28.5246	0.315551	32.8751	0.256239	33.487	0.221758	37.0701	0.157203	37.2024	0.153648	33.6104	0.2148	37.9851	0.143248	31.3014	0.262613	31.8487	0.260162	36.0669	0.185546	33.8914	0.210739	33.9869	0.223635
Symbol Type	1	33.5008	0.207983	1.05667	0.517943	1.83837	0.196819			35.2789	0.199781	28.3583	0.316621	32.5915	0.258137	33.2465	0.222631	36.7851	0.157511	37.0918	0.154023	33.3914	0.216353	37.8299	0.143976	31.1013	0.264514	31.6033	0.26298	35.8239	0.186727	33.7678	0.212244	33.7869	0.224954
Inverse Plot	TRUE	37.9075	0.140215	1.11101	0.466263	1.5557	0.252419			35.0738	0.200373	28.1988	0.317041	32.3193	0.259106	33.0158	0.222955	36.5116	0.157491	36.9857	0.154207	33.1814	0.217227	37.681	0.1444	30.9093	0.265591	31.3678	0.264681	35.5907	0.187354	33.6492	0.213212	33.5949	0.22567
Color Plot	TRUE	31.2012	0.254353	1.16974	0.420138	1.33697	0.326345			34.894	0.200389	28.0589	0.316776	32.0806	0.259067	32.8135	0.222704	36.2719	0.157145	36.8927	0.154188	32.9972	0.217353	37.5505	0.144485	30.741	0.265758	31.1613	0.265128	35.3862	0.187375	33.5452	0.213564	33.4267	0.225724
3D plot	FALSE	31.7259	0.249196	1.23339	0.37895	1.16298	0.425008			34.754	0.199826	27.9501	0.315848	31.8949	0.258022	32.656	0.221899	36.0852	0.156501	36.8203	0.153965	32.8538	0.216719	37.4489	0.144224	30.6099	0.265002	31.0005	0.264284	35.227	0.18679	33.4643	0.213271	33.2957	0.225113
Linear	FALSE	35.9454	0.179883	1.30258	0.342153	1.02154	0.557136			34.6652	0.19873	27.881	0.314332	31.777	0.256058	32.5561	0.220605	35.9668	0.155611	36.7744	0.153557	32.7628	0.215378	37.3844	0.143638	30.5268	0.263382	30.8986	0.262217	35.126	0.185645	33.4129	0.212357	33.2126	0.223885
Data Range	G20:J32	33.8295	0.205607	1.37805	0.309262	0.904487	0.734635			34.6348	0.197191	27.8573	0.312351	31.7366	0.253332	32.5219	0.218927	35.9263	0.154546	36.7587	0.152997	32.7316	0.213438	37.3623	0.142775	30.4983	0.261031	30.8636	0.259096	35.0914	0.184033	33.3953	0.210897	33.1841	0.222141
Filled Symbols	FALSE	33.8868	0.217507	1.46066	0.279845	IsoLine	IsoLine			34.6652	0.195333	27.881	0.310065	31.777	0.250066	32.5561	0.217001	35.9668	0.153394	36.7744	0.152331	32.7628	0.211055	37.3844	0.141704	30.5267	0.258139	30.8985	0.255173	35.126	0.182086	33.4129	0.209008	33.2126	0.220021
ConcAge	FALSE	IsoLine	IsoLine	1.55146	0.253522					34.754	0.193305	27.95	0.307659	31.8948	0.246524	32.656	0.214982	36.0852	0.152248	36.8203	0.151612	32.8537	0.208424	37.4489	0.140513	30.6098	0.254941	31.0004	0.250766	35.227	0.179959	33.4642	0.206843	33.2956	0.217698
ConcSwap	TRUE			1.65169	0.229954					34.8939	0.191274	28.0589	0.305329	32.0805	0.242994	32.8135	0.213034	36.2719	0.1512	36.8927	0.150898	32.9971	0.205757	37.5505	0.139297	30.7408	0.251694	31.1611	0.246231	35.3861	0.177827	33.5451	0.204578	33.4266	0.215359
1st Symbol-row	1			1.76287	0.208838					35.0737	0.189402	28.1987	0.303263	32.3192	0.23976	33.0157	0.211316	36.5116	0.150335	36.9857	0.150248	33.1813	0.203271	37.681	0.138156	30.9091	0.248663	31.3675	0.241937	35.5906	0.175861	33.6491	0.202397	33.5949	0.213194
				1.88685	0.18991					35.2788	0.187843	28.3582	0.301629	32.5913	0.237086	33.2464	0.209966	36.7851	0.149724	37.0918	0.149714	33.3913	0.201166	37.8299	0.137182	31.1011	0.246093	31.603	0.23823	35.8238	0.174221	33.7676	0.200476	33.7868	0.211378
				2.02596	0.17293					35.4925	0.186721	28.5245	0.300558	32.875	0.235188	33.4869	0.209094	37.0701	0.149416	37.2024	0.14934	33.6103	0.199613	37.9851	0.136454	31.3012	0.244193	31.8485	0.235412	36.0669	0.17304	33.8912	0.19897	33.9868	0.210059
				2.18307	0.157689					35.6976	0.186129	28.684	0.300138	33.1472	0.234219	33.7176	0.20877	37.3436	0.149435	37.3085	0.149155	33.8203	0.198739	38.134	0.13603	31.4932	0.243115	32.084	0.233711	36.3001	0.172413	34.0098	0.198002	34.1787	0.209344
				2.36187	0.144					35.8774	0.186113	28.8239	0.300403	33.3858	0.234258	33.9199	0.209021	37.5834	0.149781	37.4015	0.149175	34.0045	0.198613	38.2645	0.135945	31.6615	0.242948	32.2905	0.233264	36.5045	0.172391	34.1138	0.197651	34.347	0.209289
				2.56714	0.131695					36.0174	0.186676	28.9328	0.301331	33.5716	0.235303	34.0774	0.209826	37.77	0.150426	37.4739	0.149398	34.1479	0.199247	38.3661	0.136206	31.7926	0.243705	32.4512	0.234108	36.6637	0.172976	34.1947	0.197943	34.4779	0.209901
				2.80512	0.120627					36.1062	0.187771	29.0018	0.302847	33.6894	0.237267	34.1773	0.211119	37.8884	0.151316	37.5198	0.149806	34.2389	0.200588	38.4306	0.136792	31.8757	0.245324	32.5532	0.236174	36.7647	0.174121	34.2461	0.198857	34.561	0.211128
				3.08425	0.110664					36.1366	0.189311	29.0255	0.304828	33.7298	0.239993	34.2115	0.212798	37.929	0.15238	37.5355	0.150366	34.27	0.202529	38.4527	0.137655	31.9042	0.247675	32.5882	0.239296	36.7993	0.175733	34.2637	0.200318	34.5895	0.212873
				3.41608	0.101689					Black	Black	Black	Black	Black	Black	Black	Black	Black	Black	Black	Black	Black	Black	Black	Black	Black	Black	Black	Black	Black	Black	Black	Black	Black	Black
				3.81698	0.0935972
				4.31086	0.0862963
				4.9341	0.0797033
				5.7449	0.0737445
				6.84258	0.0683541
				8.41155	0.0634736
				10.8374	0.0590507
				13	0.0570076
				IsoLine	IsoLine

## Sheet: PlotDat6
Source sheet	Final	35.1124	0.168584	0.832237	0.9	15.6212	0.0547005	0	0.692851	35.6706	0.167525	39.3118	0.114371	38.58	0.133918	36.7806	0.158627	41.0812	0.100166	37.6957	0.151114	10.1389	0.548309	9.16135	0.570634	23.8293	0.339983	26.657	0.293135	11.2121	0.541928	19.9604	0.400739
Plot name	Concordia6	38.85	0.115017	0.836603	0.887424	7.56836	0.0657994	13	0.499362	35.648	0.168358	39.2931	0.114822	38.5441	0.134734	36.751	0.159527	41.0163	0.102603	37.6569	0.152006	10.1269	0.549935	9.15222	0.572932	23.7953	0.34481	26.6239	0.295668	11.1862	0.551178	19.9293	0.404891
Plot Type	1	37.6932	0.134501	0.874816	0.795551	4.88752	0.0801223			35.582	0.169209	39.2385	0.11529	38.4392	0.13553	36.6645	0.160424	40.8268	0.105334	37.5437	0.152843	10.0918	0.550846	9.12561	0.574811	23.6959	0.349933	26.5273	0.298175	11.1098	0.559866	19.8387	0.408946
1st free col	35	36.049	0.159486	0.915645	0.713734	3.54967	0.0987156			35.478	0.17001	39.1525	0.115735	38.2739	0.136244	36.5281	0.161245	40.5282	0.108138	37.3651	0.153559	10.0365	0.550966	9.08368	0.576119	23.5392	0.354937	26.3749	0.300453	10.9863	0.567612	19.6958	0.412577
Sigma Level	2	39.4789	0.106228	0.959354	0.640842	2.74902	0.122987			35.3443	0.170696	39.0419	0.116123	38.0616	0.136816	36.353	0.161923	40.1445	0.110786	37.1357	0.154095	9.9655	0.550287	9.02984	0.576752	23.3379	0.359416	26.1793	0.302319	10.8209	0.574078	19.5123	0.415488
Absolute Errs	TRUE	36.7377	0.151342	1.00625	0.575874	2.21696	0.154833			35.1918	0.17121	38.9158	0.11642	37.8194	0.1372	36.1531	0.162404	39.7069	0.113065	36.874	0.154408	9.88454	0.548864	8.96844	0.576656	23.1083	0.363008	25.9561	0.30362	10.621	0.57898	19.303	0.417444
Symbol Type	1	9.84252	0.541096	1.05667	0.517943	1.83837	0.196819			35.0329	0.171511	38.7843	0.116604	37.567	0.137366	35.9449	0.162649	39.2509	0.11479	36.6013	0.154473	9.80017	0.546811	8.90445	0.575841	22.869	0.365422	25.7235	0.304252	10.3952	0.582105	19.0848	0.418287
Inverse Plot	TRUE	8.93655	0.56777	1.11101	0.466263	1.5557	0.252419			34.8804	0.171576	38.6582	0.11666	37.3248	0.1373	35.7451	0.162637	38.8133	0.115822	36.3397	0.154284	9.71924	0.544295	8.84306	0.574372	22.6394	0.366461	25.5003	0.304163	10.1535	0.583317	18.8755	0.417948
Color Plot	TRUE	22.9885	0.348462	1.16974	0.420138	1.33697	0.326345			34.7468	0.171398	38.5476	0.116582	37.1124	0.137007	35.5699	0.16237	38.4296	0.116076	36.1103	0.153857	9.64829	0.541519	8.78925	0.572368	22.438	0.366043	25.3047	0.303361	9.9064	0.582561	18.692	0.416455
3D plot	FALSE	25.8398	0.295355	1.23339	0.37895	1.16298	0.425008			34.6427	0.170992	38.4615	0.116378	36.9471	0.136511	35.4336	0.161869	38.1309	0.115533	35.9317	0.153226	9.59308	0.53871	8.74737	0.569992	22.2813	0.3642	25.1524	0.301909	9.6647	0.579872	18.5491	0.413928
Linear	FALSE	10.0301	0.538314	1.30258	0.342153	1.02154	0.557136			34.5767	0.170391	38.4069	0.116063	36.8423	0.135852	35.3471	0.161176	37.9415	0.114235	35.8185	0.152442	9.55807	0.536094	8.72082	0.567436	22.1818	0.361082	25.0557	0.299927	9.43897	0.575366	18.4584	0.410573
Data Range	G34:J45	19.1939	0.4037	1.37805	0.309262	0.904487	0.734635			34.5541	0.169644	38.3882	0.115664	36.8064	0.135084	35.3174	0.160345	37.8766	0.112289	35.7796	0.151569	9.54611	0.533883	8.71175	0.564906	22.1477	0.356942	25.0226	0.297574	9.23908	0.569241	18.4274	0.406661
Filled Symbols	FALSE	IsoLine	IsoLine	1.46066	0.279845	IsoLine	IsoLine			34.5767	0.168811	38.4069	0.115212	36.8423	0.134269	35.347	0.159445	37.9415	0.109852	35.8185	0.150678	9.55817	0.532256	8.72088	0.562609	22.1817	0.352115	25.0557	0.295042	9.07375	0.561764	18.4584	0.40251
ConcAge	FALSE			1.55146	0.253522					34.6427	0.167959	38.4615	0.114745	36.9471	0.133472	35.4336	0.158548	38.1309	0.107121	35.9317	0.149841	9.59326	0.531346	8.74749	0.56073	22.2811	0.346992	25.1523	0.292535	8.95022	0.553262	18.549	0.398454
ConcSwap	TRUE			1.65169	0.229954					34.7468	0.167158	38.5476	0.114299	37.1124	0.132759	35.5699	0.157727	38.4296	0.104318	36.1103	0.149125	9.64854	0.531225	8.78942	0.559421	22.4378	0.341988	25.3046	0.290256	8.87389	0.544107	18.6919	0.394824
1st Symbol-row	1			1.76287	0.208838					34.8804	0.166473	38.6582	0.113912	37.3248	0.132187	35.7451	0.157048	38.8132	0.101669	36.3397	0.148589	9.71954	0.531904	8.84326	0.558789	22.6391	0.337508	25.5003	0.28839	8.84809	0.534699	18.8754	0.391913
				1.88685	0.18991					35.0329	0.165958	38.7843	0.113614	37.567	0.131802	35.9449	0.156568	39.2508	0.09939	36.6013	0.148276	9.8005	0.533328	8.90467	0.558884	22.8687	0.333916	25.7235	0.287089	8.87395	0.525449	19.0847	0.389956
				2.02596	0.17293					35.1918	0.165657	38.9158	0.11343	37.8194	0.131637	36.1531	0.156323	39.7069	0.0976648	36.874	0.148211	9.88487	0.535381	8.96865	0.5597	23.108	0.331503	25.9561	0.286457	8.95034	0.516761	19.3029	0.389113
				2.18307	0.157689					35.3443	0.165592	39.0419	0.113375	38.0616	0.131703	36.3529	0.156335	40.1445	0.0966332	37.1357	0.1484	9.9658	0.537897	9.03004	0.561169	23.3376	0.330463	26.1792	0.286546	9.07391	0.509015	19.5122	0.389452
				2.36187	0.144					35.478	0.16577	39.1525	0.113452	38.2739	0.131996	36.5281	0.156602	40.5281	0.0963789	37.3651	0.148827	10.0368	0.540672	9.08385	0.563173	23.539	0.330882	26.3749	0.287349	9.23928	0.502549	19.6958	0.390946
				2.56714	0.131695					35.582	0.166176	39.2385	0.113657	38.4392	0.132492	36.6645	0.157102	40.8268	0.0969225	37.5437	0.149458	10.092	0.543482	9.12573	0.565549	23.6958	0.332725	26.5272	0.2888	9.43921	0.497647	19.8386	0.393472
				2.80512	0.120627					35.648	0.166777	39.2931	0.113971	38.5441	0.13315	36.751	0.157796	41.0163	0.09822	37.6569	0.150242	10.127	0.546098	9.15228	0.568105	23.7952	0.335843	26.6239	0.290782	9.66496	0.494522	19.9293	0.396827
				3.08425	0.110664					35.6706	0.167525	39.3118	0.114371	38.58	0.133918	36.7806	0.158627	41.0812	0.100166	37.6957	0.151114	10.1389	0.548309	9.16135	0.570634	23.8293	0.339983	26.657	0.293135	9.90667	0.49331	19.9604	0.400739
				3.41608	0.101689					Black	Black	Black	Black	Black	Black	Black	Black	Black	Black	Black	Black	Black	Black	Black	Black	Black	Black	Black	Black	10.1538	0.494066	Black	Black
				3.81698	0.0935972																									10.3955	0.496755
				4.31086	0.0862963																									10.6212	0.501261
				4.9341	0.0797033																									10.8211	0.507386
				5.7449	0.0737445																									10.9864	0.514863
				6.84258	0.0683541																									11.11	0.523365
				8.41155	0.0634736																									11.1863	0.53252
				10.8374	0.0590507																									11.2121	0.541928
				13	0.0570076																									Black	Black
				IsoLine	IsoLine

## Sheet: PlotDat7
Source sheet	Final	35.1124	0.168584	0.873411	0.8	15.6212	0.0547005	0	0.692851	35.6706	0.167525	39.3118	0.114371	38.58	0.133918	36.7806	0.158627	41.0812	0.100166	37.6957	0.151114	10.1389	0.548309	9.16135	0.570634	23.8293	0.339983	26.657	0.293135	11.2121	0.541928	19.9604	0.400739
Plot name	Concordia7	38.85	0.115017	0.90228	0.738893	7.56836	0.0657994	13	0.499362	35.648	0.168358	39.2931	0.114822	38.5441	0.134734	36.751	0.159527	41.0163	0.102603	37.6569	0.152006	10.1269	0.549935	9.15222	0.572932	23.7953	0.34481	26.6239	0.295668	11.1959	0.549264	19.9293	0.404891
Plot Type	1	37.6932	0.134501	0.943269	0.666121	4.88752	0.0801223			35.582	0.169209	39.2385	0.11529	38.4392	0.13553	36.6645	0.160424	40.8268	0.105334	37.5437	0.152843	10.0918	0.550846	9.12561	0.574811	23.6959	0.349933	26.5273	0.298175	11.148	0.556302	19.8387	0.408946
1st free col	35	36.049	0.159486	0.987086	0.60097	3.54967	0.0987156			35.478	0.17001	39.1525	0.115735	38.2739	0.136244	36.5281	0.161245	40.5282	0.108138	37.3651	0.153559	10.0365	0.550966	9.08368	0.576119	23.5392	0.354937	26.3749	0.300453	11.0696	0.562848	19.6958	0.412577
Sigma Level	2	39.4789	0.106228	1.03402	0.542618	2.74902	0.122987			35.3443	0.170696	39.0419	0.116123	38.0616	0.136816	36.353	0.161923	40.1445	0.110786	37.1357	0.154095	9.9655	0.550287	9.02984	0.576752	23.3379	0.359416	26.1793	0.302319	10.9628	0.568726	19.5123	0.415488
Absolute Errs	TRUE	36.7377	0.151342	1.08441	0.490335	2.21696	0.154833			35.1918	0.17121	38.9158	0.11642	37.8194	0.1372	36.1531	0.162404	39.7069	0.113065	36.874	0.154408	9.88454	0.548864	8.96844	0.576656	23.1083	0.363008	25.9561	0.30362	10.8305	0.573774	19.303	0.417444
Symbol Type	1	9.84252	0.541096	1.13862	0.443469	1.83837	0.196819			35.0329	0.171511	38.7843	0.116604	37.567	0.137366	35.9449	0.162649	39.2509	0.11479	36.6013	0.154473	9.80017	0.546811	8.90445	0.575841	22.869	0.365422	25.7235	0.304252	10.6765	0.577855	19.0848	0.418287
Inverse Plot	TRUE	8.93655	0.56777	1.19711	0.401441	1.5557	0.252419			34.8804	0.171576	38.6582	0.11666	37.3248	0.1373	35.7451	0.162637	38.8133	0.115822	36.3397	0.154284	9.71924	0.544295	8.84306	0.574372	22.6394	0.366461	25.5003	0.304163	10.5048	0.580857	18.8755	0.417948
Color Plot	TRUE	22.9885	0.348462	1.26036	0.363733	1.33697	0.326345			34.7468	0.171398	38.5476	0.116582	37.1124	0.137007	35.5699	0.16237	38.4296	0.116076	36.1103	0.153857	9.64829	0.541519	8.78925	0.572368	22.438	0.366043	25.3047	0.303361	10.3201	0.582699	18.692	0.416455
3D plot	FALSE	25.8398	0.295355	1.32898	0.329886	1.16298	0.425008			34.6427	0.170992	38.4615	0.116378	36.9471	0.136511	35.4336	0.161869	38.1309	0.115533	35.9317	0.153226	9.59308	0.53871	8.74737	0.569992	22.2813	0.3642	25.1524	0.301909	10.1276	0.58333	18.5491	0.413928
Linear	FALSE	10.0301	0.538314	1.40366	0.29949	1.02154	0.557136			34.5767	0.170391	38.4069	0.116063	36.8423	0.135852	35.3471	0.161176	37.9415	0.114235	35.8185	0.152442	9.55807	0.536094	8.72082	0.567436	22.1818	0.361082	25.0557	0.299927	9.93234	0.582733	18.4584	0.410573
Data Range	G34:J45	19.1939	0.4037	1.48521	0.272179	0.904487	0.734635			34.5541	0.169644	38.3882	0.115664	36.8064	0.135084	35.3174	0.160345	37.8766	0.112289	35.7796	0.151569	9.54611	0.533883	8.71175	0.564906	22.1477	0.356942	25.0226	0.297574	9.73979	0.580924	18.4274	0.406661
Filled Symbols	FALSE	IsoLine	IsoLine	1.5746	0.247627	IsoLine	IsoLine			34.5767	0.168811	38.4069	0.115212	36.8423	0.134269	35.347	0.159445	37.9415	0.109852	35.8185	0.150678	9.55817	0.532256	8.72088	0.562609	22.1817	0.352115	25.0557	0.295042	9.55516	0.577953	18.4584	0.40251
ConcAge	FALSE			1.67299	0.225543					34.6427	0.167959	38.4615	0.114745	36.9471	0.133472	35.4336	0.158548	38.1309	0.107121	35.9317	0.149841	9.59326	0.531346	8.74749	0.56073	22.2811	0.346992	25.1523	0.292535	9.38348	0.573901	18.549	0.398454
ConcSwap	TRUE			1.78179	0.205669					34.7468	0.167158	38.5476	0.114299	37.1124	0.132759	35.5699	0.157727	38.4296	0.104318	36.1103	0.149125	9.64854	0.531225	8.78942	0.559421	22.4378	0.341988	25.3046	0.290256	9.22944	0.568878	18.6919	0.394824
1st Symbol-row	1			1.9027	0.187774					34.8804	0.166473	38.6582	0.113912	37.3248	0.132187	35.7451	0.157048	38.8132	0.101669	36.3397	0.148589	9.71954	0.531904	8.84326	0.558789	22.6391	0.337508	25.5003	0.28839	9.09724	0.563022	18.8754	0.391913
				2.03782	0.17165					35.0329	0.165958	38.7843	0.113614	37.567	0.131802	35.9449	0.156568	39.2508	0.09939	36.6013	0.148276	9.8005	0.533328	8.90467	0.558884	22.8687	0.333916	25.7235	0.287089	8.99049	0.556491	19.0847	0.389956
				2.18978	0.157113					35.1918	0.165657	38.9158	0.11343	37.8194	0.131637	36.1531	0.156323	39.7069	0.0976648	36.874	0.148211	9.88487	0.535381	8.96865	0.5597	23.108	0.331503	25.9561	0.286457	8.91209	0.549465	19.3029	0.389113
				2.36187	0.144					35.3443	0.165592	39.0419	0.113375	38.0616	0.131703	36.3529	0.156335	40.1445	0.0966332	37.1357	0.1484	9.9658	0.537897	9.03004	0.561169	23.3376	0.330463	26.1792	0.286546	8.86419	0.542134	19.5122	0.389452
				2.55835	0.132163					35.478	0.16577	39.1525	0.113452	38.2739	0.131996	36.5281	0.156602	40.5281	0.0963789	37.3651	0.148827	10.0368	0.540672	9.08385	0.563173	23.539	0.330882	26.3749	0.287349	8.84809	0.534699	19.6958	0.390946
				2.7847	0.12147					35.582	0.166176	39.2385	0.113657	38.4392	0.132492	36.6645	0.157102	40.8268	0.0969225	37.5437	0.149458	10.092	0.543482	9.12573	0.565549	23.6958	0.332725	26.5272	0.2888	8.86423	0.527363	19.8386	0.393472
				3.04823	0.111805					35.648	0.166777	39.2931	0.113971	38.5441	0.13315	36.751	0.157796	41.0163	0.09822	37.6569	0.150242	10.127	0.546098	9.15228	0.568105	23.7952	0.335843	26.6239	0.290782	8.91218	0.520325	19.9293	0.396827
				3.35884	0.103063					35.6706	0.167525	39.3118	0.114371	38.58	0.133918	36.7806	0.158627	41.0812	0.100166	37.6957	0.151114	10.1389	0.548309	9.16135	0.570634	23.8293	0.339983	26.657	0.293135	8.99062	0.513779	19.9604	0.400739
				3.73027	0.0951495					Black	Black	Black	Black	Black	Black	Black	Black	Black	Black	Black	Black	Black	Black	Black	Black	Black	Black	Black	Black	9.09741	0.507901	Black	Black
				4.18217	0.087981																									9.22964	0.502853
				4.74373	0.0814824																									9.38371	0.498772
				5.46013	0.0755864																									9.55541	0.49577
				6.40537	0.070233																									9.74006	0.493928
				7.70955	0.0653681																									9.93262	0.493297
				9.62436	0.0609435																									10.1278	0.493894
				12.7087	0.0569159																									10.3204	0.495703
				13	0.0567314																									10.505	0.498674
				IsoLine	IsoLine																									10.6767	0.502726
																														10.8307	0.507749
																														10.9629	0.513605
																														11.0697	0.520136
																														11.1481	0.527162
																														11.196	0.534493
																														11.2121	0.541928
																														Black	Black

## Sheet: Final
Table DR6. LA-ICP-MS titanite U-Pb dating of IOA and iron skarn ores in the Wangbaoshan iron deposit, Daye district.
	Th	U	Th/U	207Pb/206Pb		207Pb/235U		206Pb/238U		206Pb/238U a
Spot #					2σ		2σ		2σ		2σ
Sample WBS14, iron skarn ore
WBS14-1	0.472	59.14	0.00798106	0.12208	0.01498	0.38236	0.04228	0.02272	0.0013	131.523	7.43905
WBS14-2	7.55	40.5	0.18642	0.23535	0.02869	0.86135	0.08513	0.02655	0.00199	129.459	9.56572
WBS14-3	1.97	3.71	0.530997	0.69008	0.10782	10.5991	0.96725	0.11143	0.01506	134.682	17.2713
WBS14-4	1.38	6.48	0.212963	0.6737	0.05117	9.05123	0.40264	0.09747	0.00657	130.707	8.40789
WBS14-5	1.75	8.38	0.208831	0.60323	0.06833	5.79281	0.40407	0.06967	0.00656	133.002	12.1147
WBS14-6	7.22	35.83	0.201507	0.36763	0.04098	1.68656	0.13021	0.03328	0.0028	126.791	10.4869
WBS14-7	3.49	12.28	0.284202	0.40196	0.07214	1.97764	0.25857	0.03569	0.00451	126.096	15.6434
WBS14-8	7.26	21.15	0.343262	0.47353	0.04103	2.87133	0.16556	0.04399	0.00302	130	8.74164
WBS14-9	8.62	34.69	0.248487	0.50454	0.03095	3.64962	0.1431	0.05248	0.00275	141.88	7.24245
WBS14-10	5.97	35.91	0.166249	0.44188	0.03795	2.70654	0.15213	0.04444	0.0031	142.58	9.72574
WBS14-11	4.22	21.31	0.198029	0.27821	0.03874	1.04591	0.11509	0.02727	0.00242	123.582	10.8197
WBS14-12	3.99	10.42	0.382917	0.60359	0.07772	5.36574	0.3985	0.06449	0.00718	122.989	13.2727
WBS14-13	3.35	14.11	0.23742	0.51636	0.06068	3.62837	0.276	0.05098	0.0048	133.029	12.2196
WBS14-14	7.22	45.97	0.157059	0.32112	0.02623	1.40834	0.08426	0.03182	0.0019	133.122	7.81983
WBS14-15	7.01	35.26	0.198809	0.41093	0.02964	2.08551	0.10328	0.03682	0.00209	127.415	7.1005
WBS14-16	5.17	15.12	0.341931	0.60968	0.05682	5.79841	0.32299	0.069	0.00555	128.166	9.97975
WBS14-17	11.57	72	0.160694	0.16576	0.015	0.58403	0.04591	0.02556	0.00126	138.908	6.75331
WBS14-18	2.95	10.18	0.289784	0.45493	0.05917	2.75301	0.25053	0.0439	0.00425	136.275	12.8994
WBS14-19	14.8	99.88	0.148178	0.27115	0.01724	1.06568	0.05306	0.02851	0.00126	130.776	5.72327
WBS14-20	5.39	47.73	0.112927	0.44469	0.03698	2.53533	0.1361	0.04136	0.0028	131.834	8.75869
Sample WBS42, IOA ore
WBS42-1	528	93.7	5.63501	0.1379	0.01401	0.44606	0.03954	0.02346	0.00125	133.219	7.02182
WBS42-2	496	116	4.27586	0.04888	0.02501	0.13849	0.07001	0.02055	0.00168	131.095	10.5996
WBS42-3	311.8	182.1	1.71225	0.09025	0.01237	0.26923	0.03436	0.02164	0.00116	131.008	6.95859
WBS42-4	575	92.45	6.21958	0.08056	0.04147	0.23514	0.11799	0.02117	0.00248	129.784	15.0357
WBS42-5	416	78.4	5.30612	0.05158	0.03726	0.14942	0.10641	0.02101	0.00262	133.566	16.4664
WBS42-6	556.9	81.81	6.80724	0.04986	0.03795	0.14979	0.11265	0.02179	0.00264	138.781	16.6537
WBS42-7	620	101.9	6.0844	0.10691	0.02115	0.31363	0.05813	0.02128	0.00154	126.072	9.00252
WBS42-8	575	92.45	6.21958	0.07248	0.01677	0.21198	0.04761	0.02121	0.00125	131.366	7.68002
WBS42-9	416	78.4	5.30612	0.12943	0.02745	0.41663	0.08068	0.02335	0.00209	134.143	11.8907
WBS42-10	556.9	81.81	6.80724	0.04877	0.01896	0.13658	0.05202	0.02031	0.00164	129.591	10.3293
WBS42-11	620	101.9	6.0844	0.08053	0.01536	0.25018	0.04589	0.02253	0.00126	138.067	7.62445
WBS42-12	520	78.6	6.61578	0.06579	0.05802	0.19003	0.16462	0.02095	0.00352	130.862	21.7385
WBS42-13	470.5	86.9	5.41427	0.08201	0.03871	0.24617	0.11291	0.02177	0.00249	133.19	15.0943
WBS42-14	506	84.2	6.0095	0.04521	0.01383	0.13058	0.03907	0.02095	0.00139	134.229	8.83138
WBS42-15	550	85.7	6.41774	0.19859	0.04744	0.63818	0.13334	0.02331	0.00276	121.317	14.2231
WBS42-16	611	105.2	5.80798	0.04777	0.02939	0.13671	0.08316	0.02076	0.00197	132.605	12.4392
WBS42-17	397	124.1	3.19903	0.09697	0.05499	0.28465	0.1559	0.02129	0.00319	127.785	18.9607
WBS42-18	412.8	75.4	5.4748	0.03911	0.01199	0.11497	0.03469	0.02132	0.00123	137.598	7.88153
Note: a— 207Pb corrected 206Pb/238U age
